# Supplementary material
Source: PubMed Central journal article supplement (PMC4440123)
Supplement: ijcep0008-3027-f3.pdf [file ijcep0008-3027-f3.pdf]

## Analysis of key pathways in HCC

**Table S1.** Significant differentially expressed genes and their involved pathways

| Gene   | pathway                                                           |
|--------|-------------------------------------------------------------------|
| E2F1   | hsa04110: Cell cycle,                                             |
| E2F1   | hsa05200: Pathways in cancer,                                     |
| E2F1   | hsa05212: Pancreatic cancer,                                      |
| E2F1   | hsa05214: Glioma,                                                 |
| E2F1   | hsa05215: Prostate cancer,                                        |
| E2F1   | hsa05218: Melanoma,                                               |
| E2F1   | hsa05219: Bladder cancer,                                         |
| E2F1   | hsa05220: Chronic myeloid leukemia,                               |
| E2F1   | hsa05222: Small cell lung cancer,                                 |
| E2F1   | hsa05223: Non-small cell lung cancer,                             |
| FAS    | hsa04010: MAPK signaling pathway,                                 |
| FAS    | hsa04060: Cytokine-cytokine receptor interaction,                 |
| FAS    | hsa04115: p53 signaling pathway,                                  |
| FAS    | hsa04210: Apoptosis,                                              |
| FAS    | hsa04650: Natural killer cell mediated cytotoxicity,              |
| FAS    | hsa04940: Type I diabetes mellitus,                               |
| FAS    | hsa05010: Alzheimer's disease,                                    |
| FAS    | hsa05200: Pathways in cancer,                                     |
| FAS    | hsa05320: Autoimmune thyroid disease,                             |
| FAS    | hsa05330: Allograft rejection,                                    |
| FAS    | hsa05332: Graft-versus-host disease,                              |
| B2M    | hsa04612: Antigen processing and presentation,                    |
| ITGB1  | hsa04360: Axon guidance,                                          |
| ITGB1  | hsa04510: Focal adhesion,                                         |
| ITGB1  | hsa04512: ECM-receptor interaction,                               |
| ITGB1  | hsa04514: Cell adhesion molecules (CAMs),                         |
| ITGB1  | hsa04670: Leukocyte transendothelial migration,                   |
| ITGB1  | hsa04810: Regulation of actin cytoskeleton,                       |
| ITGB1  | hsa05130: Pathogenic Escherichia coli infection,                  |
| ITGB1  | hsa05200: Pathways in cancer,                                     |
| ITGB1  | hsa05222: Small cell lung cancer,                                 |
| ITGB1  | hsa05410: Hypertrophic cardiomyopathy (HCM),                      |
| ITGB1  | hsa05412: Arrhythmogenic right ventricular cardiomyopathy (ARVC), |
| ITGB1  | hsa05414: Dilated cardiomyopathy,                                 |
| MMP1   | hsa03320: PPAR signaling pathway,                                 |
| MMP1   | hsa05200: Pathways in cancer,                                     |
| MMP1   | hsa05219: Bladder cancer,                                         |
| MMP2   | hsa04670: Leukocyte transendothelial migration,                   |
| MMP2   | hsa04912: GnRH signaling pathway,                                 |
| MMP2   | hsa05200: Pathways in cancer,                                     |
| MMP2   | hsa05219: Bladder cancer,                                         |
| PIK3R1 | hsa04012: ErbB signaling pathway,                                 |
| PIK3R1 | hsa04062: Chemokine signaling pathway,                            |
| PIK3R1 | hsa04070: Phosphatidylinositol signaling system,                  |
| PIK3R1 | hsa04150: mTOR signaling pathway,                                 |
| PIK3R1 | hsa04210: Apoptosis,                                              |

## Analysis of key pathways in HCC

|        |                                                      |
|--------|------------------------------------------------------|
| PIK3R1 | hsa04370: VEGF signaling pathway,                    |
| PIK3R1 | hsa04510: Focal adhesion,                            |
| PIK3R1 | hsa04620: Toll-like receptor signaling pathway,      |
| PIK3R1 | hsa04630: Jak-STAT signaling pathway,                |
| PIK3R1 | hsa04650: Natural killer cell mediated cytotoxicity, |
| PIK3R1 | hsa04660: T cell receptor signaling pathway,         |
| PIK3R1 | hsa04662: B cell receptor signaling pathway,         |
| PIK3R1 | hsa04664: Fc epsilon RI signaling pathway,           |
| PIK3R1 | hsa04666: Fc gamma R-mediated phagocytosis,          |
| PIK3R1 | hsa04670: Leukocyte transendothelial migration,      |
| PIK3R1 | hsa04722: Neurotrophin signaling pathway,            |
| PIK3R1 | hsa04810: Regulation of actin cytoskeleton,          |
| PIK3R1 | hsa04910: Insulin signaling pathway,                 |
| PIK3R1 | hsa04914: Progesterone-mediated oocyte maturation,   |
| PIK3R1 | hsa04930: Type II diabetes mellitus,                 |
| PIK3R1 | hsa04960: Aldosterone-regulated sodium reabsorption, |
| PIK3R1 | hsa05200: Pathways in cancer,                        |
| PIK3R1 | hsa05210: Colorectal cancer,                         |
| PIK3R1 | hsa05211: Renal cell carcinoma,                      |
| PIK3R1 | hsa05212: Pancreatic cancer,                         |
| PIK3R1 | hsa05213: Endometrial cancer,                        |
| PIK3R1 | hsa05214: Glioma,                                    |
| PIK3R1 | hsa05215: Prostate cancer,                           |
| PIK3R1 | hsa05218: Melanoma,                                  |
| PIK3R1 | hsa05220: Chronic myeloid leukemia,                  |
| PIK3R1 | hsa05221: Acute myeloid leukemia,                    |
| PIK3R1 | hsa05222: Small cell lung cancer,                    |
| PIK3R1 | hsa05223: Non-small cell lung cancer,                |
| PLAU   | hsa04610: Complement and coagulation cascades,       |
| PLAUR  | hsa04610: Complement and coagulation cascades,       |
| PDGFA  | hsa04010: MAPK signaling pathway,                    |
| PDGFA  | hsa04060: Cytokine-cytokine receptor interaction,    |
| PDGFA  | hsa04510: Focal adhesion,                            |
| PDGFA  | hsa04540: Gap junction,                              |
| PDGFA  | hsa04810: Regulation of actin cytoskeleton,          |
| PDGFA  | hsa05200: Pathways in cancer,                        |
| PDGFA  | hsa05214: Glioma,                                    |
| PDGFA  | hsa05215: Prostate cancer,                           |
| PDGFA  | hsa05218: Melanoma,                                  |
| RB1    | hsa04110: Cell cycle,                                |
| RB1    | hsa05200: Pathways in cancer,                        |
| RB1    | hsa05212: Pancreatic cancer,                         |
| RB1    | hsa05214: Glioma,                                    |
| RB1    | hsa05215: Prostate cancer,                           |
| RB1    | hsa05218: Melanoma,                                  |
| RB1    | hsa05219: Bladder cancer,                            |
| RB1    | hsa05220: Chronic myeloid leukemia,                  |
| RB1    | hsa05222: Small cell lung cancer,                    |
| RB1    | hsa05223: Non-small cell lung cancer,                |

## Analysis of key pathways in HCC

SERPINB5 hsa04115: p53 signaling pathway,  
SYK hsa04650: Natural killer cell mediated cytotoxicity,  
SYK hsa04662: B cell receptor signaling pathway,  
SYK hsa04664: Fc epsilon RI signaling pathway,  
SYK hsa04666: Fc gamma R-mediated phagocytosis,  
TNF hsa04010: MAPK signaling pathway,  
TNF hsa04060: Cytokine-cytokine receptor interaction,  
TNF hsa04210: Apoptosis,  
TNF hsa04350: TGF-beta signaling pathway,  
TNF hsa04620: Toll-like receptor signaling pathway,  
TNF hsa04621: NOD-like receptor signaling pathway,  
TNF hsa04622: RIG-I-like receptor signaling pathway,  
TNF hsa04640: Hematopoietic cell lineage,  
TNF hsa04650: Natural killer cell mediated cytotoxicity,  
TNF hsa04660: T cell receptor signaling pathway,  
TNF hsa04664: Fc epsilon RI signaling pathway,  
TNF hsa04920: Adipocytokine signaling pathway,  
TNF hsa04930: Type II diabetes mellitus,  
TNF hsa04940: Type I diabetes mellitus,  
TNF hsa05010: Alzheimer's disease,  
TNF hsa05014: Amyotrophic lateral sclerosis (ALS),  
TNF hsa05310: Asthma,  
TNF hsa05322: Systemic lupus erythematosus,  
TNF hsa05330: Allograft rejection,  
TNF hsa05332: Graft-versus-host disease,  
TNF hsa05410: Hypertrophic cardiomyopathy (HCM),  
TNF hsa05414: Dilated cardiomyopathy,  
TP53 hsa04010: MAPK signaling pathway,  
TP53 hsa04110: Cell cycle,  
TP53 hsa04115: p53 signaling pathway,  
TP53 hsa04210: Apoptosis,  
TP53 hsa04310: Wnt signaling pathway,  
TP53 hsa04722: Neurotrophin signaling pathway,  
TP53 hsa05014: Amyotrophic lateral sclerosis (ALS),  
TP53 hsa05016: Huntington's disease,  
TP53 hsa05200: Pathways in cancer,  
TP53 hsa05210: Colorectal cancer,  
TP53 hsa05212: Pancreatic cancer,  
TP53 hsa05213: Endometrial cancer,  
TP53 hsa05214: Glioma,  
TP53 hsa05215: Prostate cancer,  
TP53 hsa05216: Thyroid cancer,  
TP53 hsa05217: Basal cell carcinoma,  
TP53 hsa05218: Melanoma,  
TP53 hsa05219: Bladder cancer,  
TP53 hsa05220: Chronic myeloid leukemia,  
TP53 hsa05222: Small cell lung cancer,  
TP53 hsa05223: Non-small cell lung cancer,  
AKT1 hsa04010: MAPK signaling pathway,

## Analysis of key pathways in HCC

|       |                                                    |
|-------|----------------------------------------------------|
| AKT1  | hsa04012: ErbB signaling pathway,                  |
| AKT1  | hsa04062: Chemokine signaling pathway,             |
| AKT1  | hsa04150: mTOR signaling pathway,                  |
| AKT1  | hsa04210: Apoptosis,                               |
| AKT1  | hsa04370: VEGF signaling pathway,                  |
| AKT1  | hsa04510: Focal adhesion,                          |
| AKT1  | hsa04530: Tight junction,                          |
| AKT1  | hsa04620: Toll-like receptor signaling pathway,    |
| AKT1  | hsa04630: Jak-STAT signaling pathway,              |
| AKT1  | hsa04660: T cell receptor signaling pathway,       |
| AKT1  | hsa04662: B cell receptor signaling pathway,       |
| AKT1  | hsa04664: Fc epsilon RI signaling pathway,         |
| AKT1  | hsa04666: Fc gamma R-mediated phagocytosis,        |
| AKT1  | hsa04722: Neurotrophin signaling pathway,          |
| AKT1  | hsa04910: Insulin signaling pathway,               |
| AKT1  | hsa04914: Progesterone-mediated oocyte maturation, |
| AKT1  | hsa04920: Adipocytokine signaling pathway,         |
| AKT1  | hsa05200: Pathways in cancer,                      |
| AKT1  | hsa05210: Colorectal cancer,                       |
| AKT1  | hsa05211: Renal cell carcinoma,                    |
| AKT1  | hsa05212: Pancreatic cancer,                       |
| AKT1  | hsa05213: Endometrial cancer,                      |
| AKT1  | hsa05214: Glioma,                                  |
| AKT1  | hsa05215: Prostate cancer,                         |
| AKT1  | hsa05218: Melanoma,                                |
| AKT1  | hsa05220: Chronic myeloid leukemia,                |
| AKT1  | hsa05221: Acute myeloid leukemia,                  |
| AKT1  | hsa05222: Small cell lung cancer,                  |
| AKT1  | hsa05223: Non-small cell lung cancer,              |
| ERBB2 | hsa04012: ErbB signaling pathway,                  |
| ERBB2 | hsa04020: Calcium signaling pathway,               |
| ERBB2 | hsa04510: Focal adhesion,                          |
| ERBB2 | hsa04520: Adherens junction,                       |
| ERBB2 | hsa05200: Pathways in cancer,                      |
| ERBB2 | hsa05212: Pancreatic cancer,                       |
| ERBB2 | hsa05213: Endometrial cancer,                      |
| ERBB2 | hsa05215: Prostate cancer,                         |
| ERBB2 | hsa05219: Bladder cancer,                          |
| ERBB2 | hsa05223: Non-small cell lung cancer,              |

---
